# Supplementary material for: Erhebung von Schmerzen nach ambulanten Operationen
Source: Springer Nature journal article supplement (doi:10.1007/s00482-015-0071-8), 2015-11-05
Supplement: MOESM2 [file 8562808]

**Fragenübersicht: Effektivität postoperativer Schmerztherapie**

**Fragebogen zu Tag 3 und 7:**

- ***Bitte kreuzen Sie auf der nachstehenden Skala die Stärke Ihrer momentanen Schmerzen an, wenn Sie sich ruhig verhalten.*** Skala: 0 = kein Schmerz - 10 = maximal vorstellbarer Schmerz
- ***Bitte kreuzen Sie auf der nachstehenden Skala die Stärke Ihrer momentanen Schmerzen unter Belastung an, zum Beispiel, wenn Sie sich bewegen, beim Aufstehen, beim Husten oder tiefem Durchatmen***. Skala: 0 = kein Schmerz - 10 = maximal vorstellbarer Schmerz
- **Wie stark waren Ihre stärksten Schmerzen in den letzten 24 Stunden?**

Skala: 0 = kein Schmerz - 10 = maximal vorstellbarer Schmerz

- ***Wie oft hatten Sie seit Ihrer Operation starke Schmerzen? Bitte schätzen Sie den Zeitanteil, in dem Sie nach der Operation unter starken Schmerzen gelitten haben***.

Skala: 0% = nie starke Schmerzen - 100% = ständig starke Schmerzen

- ***Haben Sie wegen Ihrer Schmerzen noch einmal Kontakt zu einem Arzt aufgenommen?***

-ja, zur Klinik

-ja, zu meinem Hausarzt / Facharzt

-ja, zu sonstigen

-nein

- ***Wurde Ihnen bei diesem Kontakt ein Schmerzmittel verschrieben?***

***-***ja

***-***nein

- ***Welche Medikamente wurden Ihnen verschrieben?***

***-Freitextfeld-***

- ***Haben Sie diese Medikamente eingenommen?***

***-***Ja

***-***Nein, warum nicht: ____________________

- ***Haben Ihnen die Medikamente geholfen?***

***-***ja

***-***ja, aber sie waren nicht ausreichend stark

***-***ja, sie haben aber nicht ausreichend lange gewirkt

***-***nein

- ***Warum wurde Ihnen kein Medikament verschrieben?***

***-***der Arzt hat mir rezeptfreie Medikamente empfohlen

***-***der Arzt hat mir andere Möglichkeiten der Schmerztherapie empfohlen

***-***der Arzt wollte mir keine Medikamente verschreiben

***-***sonstiges

- ***Haben Sie dennoch Medikamente eingenommen? (z.B. rezeptfreie Medikamente, die Sie noch zu Hause hatten?)***

***-***Ja, und zwar ___________________________

***-***Nein

- ***Haben Ihnen diese Medikamente geholfen?***

***-***Ja

***-***Nein

- ***Wie haben Sie in den letzten 24 Stunden geschlafen (im Vergleich zum üblichen Schlaf)?***

***-***besser

***-***unverändert

***-***etwas schlechter als sonst

***-***sehr viel schlechter als sonst

***-***gar nicht geschlafen

- ***Sind Sie weiterhin krank / arbeitsunfähig geschrieben?***

***-***ja

***-***nein

- ***Bitte bewerten Sie die Schmerzbehandlung, die Sie erhalten haben, mit einer Schulnote (1-6).***

-Skala: 1 - 6
