# Supplementary material for: Erhebung von Schmerzen nach ambulanten Operationen
Source: Springer Nature journal article supplement (doi:10.1007/s00482-015-0071-8), 2015-11-05
Supplement: MOESM3 [file 8562808]

**Fragenübersicht: Evaluationsbogen**

**Identifikation:**

ID des Patienten:

Medizinische Fachrichtung:

Datum der Studienaufnahme:

Sind laut System alle bisherigen Fragebögen vom Patienten ausgefüllt? □ Ja □ Nein

Es fehlt der/die Fragebogen /-bögen mit der Bezeichnung: ­­­­­­­­­­­­­­­___________________________

**Technischer Teil:**

- 1.1 Wie viele Fragebögen haben Sie erhalten? □ Keinen □ 1 □ 2□ 3
- 1.2 Ist eine der Emails im SPAM-Ordner gelandet? □ Ja □ Nein
- 1.3 Konnten Sie den Link öffnen? □ Ja □ Nein
- 1.4 Haben Sie manche Fragen nur teilweise / verzerrt / unleserlich angezeigt bekommen? Falls ja, nennen Sie mir bitte, wenn möglich, die Frage. □ Ja □ Nein
- 1.5 War die Schriftgröße groß genug gewählt? □ Ja □ Nein
- 1.6 Waren die Antwortmöglichkeiten optisch deutlich genug von einander und von den Fragen zu unterscheiden? □ Ja □ Nein
- 1.7 Hatten Sie Schwierigkeiten mit dem Ausfüllen der Freitext-Felder □ Ja □ Nein

**Kontrolle der Anwenderfreundlichkeit:**

- 2.1 Haben Sie den Eindruck, dass der Fragebogen aus zu vielen Fragen besteht bzw. zu aufwendig ist? □ Ja □ Nein
- 2.2 Empfanden Sie eine Frage als überflüssig? Falls ja, nennen Sie mir bitte, wenn möglich, die Frage □ Ja □ Nein
- 2.3. Fanden Sie eine Frage zu kompliziert gestellt bzw. haben Sie eine Frage inhaltlich nicht verstanden? □ Ja □ Nein
- 2.4 Wurden Dinge gefragt, die Ihnen unangenehm waren bzw. die Sie aus Schamgefühl nicht beantworten wollten? □ Ja □ Nein
- 2.5 Hatten Sie das Gefühl, dass etwas Wichtiges nicht gefragt wurde, was Sie in Zusammenhang mit Schmerzen erlebt haben oder in Verbindung bringen würden?

□ Ja □ Nein

- 2.6. Haben Sie noch Anmerkungen und Änderungswünsche, die Sie gerne äußern würden? □ Ja □ Nein

***Jeder Frage ist noch ein Freitextfeld für Kommentare angeschlossen, was hier aus Platzgründen weggelassen wurde.***
